# Supplementary material
Source: PubMed Central journal article supplement (PMC6258858)
Supplement: zjm011186154s1.pdf [file zjm011186154s1.pdf]

1 Sonication versus tissue sampling for diagnosis of prosthetic joint and other orthopaedic  
2 device-related infections.

3 SUPPLEMENTARY APPENDIX

4

5 Maria Dudareva<sup>a#</sup>, Lucinda Barrett<sup>a</sup>, Mel Figtree<sup>b</sup>, Matthew Scarborough<sup>a</sup>, Masanori  
6 Watanabe<sup>c</sup>, Robert Newnham<sup>a</sup>, Rachael Wallis<sup>f</sup>, Sarah Oakley<sup>a</sup>, Ben Kendrick<sup>d</sup>, David Stubbs<sup>d</sup>,  
7 Martin A McNally<sup>d</sup>, Philip Bejon<sup>a,e</sup>, Bridget L Atkins<sup>a</sup>, Adrian Taylor<sup>d</sup>, Andrew J Brent<sup>a,e\*</sup>

8

9 <sup>a</sup> Dept Microbiology, Oxford University Hospitals NHS Foundation Trust, Oxford, UK

10 <sup>b</sup> Dept Microbiology, Royal North Shore Hospital, Sydney, Australia

11 <sup>c</sup> Dept Medicine, Oxford University Hospitals NHS Foundation Trust, Oxford, UK

12 <sup>d</sup> Nuffield Orthopaedic Centre, Oxford University Hospitals NHS Foundation Trust, Oxford, UK

13 <sup>e</sup> Nuffield Department of Medicine, University of Oxford, Oxford, UK

14 <sup>f</sup> Department of Medicine, University of Southampton, UK

**Table S - 1 Summary of published studies comparing sonication and tissue culture for diagnosis of prosthetic joint infection (PJI) and other (Trampuz et al., 2006) orthopaedic device-related infections (DRI).**

| Author & Year (reference)             | Case mix <sup>k</sup> | Definition of infection <sup>l</sup> | No. infected cases | No. aseptic cases | % early infection cases <sup>a</sup> | Antibiotics in 14 days prior to surgery, % | Methodology                             |                                       |                               | Sensitivity, %                              |                    | Specificity, % |                    |                |
|---------------------------------------|-----------------------|--------------------------------------|--------------------|-------------------|--------------------------------------|--------------------------------------------|-----------------------------------------|---------------------------------------|-------------------------------|---------------------------------------------|--------------------|----------------|--------------------|----------------|
|                                       |                       |                                      |                    |                   |                                      |                                            | Number of tissue specimens <sup>b</sup> | Automated liquid culture <sup>p</sup> | Sonication fluid concentrated | Sonication threshold (cfu/ml <sup>q</sup> ) | Sonication culture | Tissue culture | Sonication culture | Tissue culture |
| Trampuz 2006 <sup>1</sup>             | PJI                   | Clinical <sup>2</sup>                | 24                 | 54                |                                      | 54                                         | ≥2                                      | Synovial only                         | No                            | 2                                           | 75                 | 54             | 87                 | 98             |
| Dora 2007 <sup>3</sup>                | PJI                   | Other clinical                       | 14                 | 55                |                                      |                                            | mean 4                                  |                                       | No                            | 2                                           | 71                 | 79             | 96                 | 98             |
| Trampuz 2007 <sup>2</sup>             | PJI                   | Clinical <sup>2</sup>                | 79                 | 252               |                                      | 56                                         | ≥2                                      | Tissue                                | No                            | 10                                          | 79                 | 61             | 89                 | 99             |
| Esteban 2008 <sup>4</sup>             | PJI, DRI              | Modified clinical                    | 17 <sup>d</sup>    | 14 <sup>d</sup>   |                                      |                                            | 3 to 5                                  |                                       | Yes                           | 10 <sup>m</sup>                             | 94                 | 88             | 43                 | 100            |
| Piper 2009 <sup>5</sup>               | PJI                   | Clinical <sup>2</sup>                | 33                 | 101               | <sup>g</sup>                         | 24                                         | ≥2                                      |                                       | No/Yes                        | 10                                          | 67                 | 55             | 98                 | 95             |
| Sampedro 2010 <sup>6</sup>            | DRI                   | IDSA <sup>7</sup>                    | 36                 | 76                | 82                                   | >39                                        | 2 to 9                                  |                                       | No/Yes                        | 10 to 1000 <sup>i</sup>                     | 91                 | 73             | 97                 | 93             |
| Verdigis 2011 <sup>8</sup>            | PJI                   | IDSA <sup>7</sup>                    | 9                  | 27                | <sup>g</sup>                         | 33                                         | ≥2                                      |                                       | Yes                           | 0.1 to 2 <sup>j</sup>                       | 89                 | 55             | 100                | 93             |
| Bjerkan 2012 <sup>9</sup>             | PJI                   | IDSA <sup>7</sup>                    | 18                 | 36                |                                      |                                            | 5                                       |                                       | Yes                           | 1.6                                         | 82                 | 100            | 100                | 100            |
| Gomez 2012 <sup>10</sup>              | PJI                   | Clinical <sup>2</sup>                | 135                | 231               | 76 <sup>h</sup>                      | 51 <sup>e</sup>                            | ≥2                                      | Synovial only                         | Yes                           | 2                                           | 73                 | 70             | 98                 | 99             |
| Borens 2013 <sup>11</sup>             | PJI, DRI              | Modified MSIS                        | 12                 | 27                | 66                                   |                                            | Not stated                              |                                       | No                            | 10 <sup>m</sup>                             | 83                 | 100            |                    |                |
| Evangelopoulos 2013 <sup>12</sup>     | PJI                   | MSIS <sup>13</sup>                   | 24                 | 10                |                                      | 0                                          | ≥2                                      |                                       | Not stated                    | Not stated                                  | 71                 | 47             |                    |                |
| Janz 2013 <sup>14</sup>               | PJI                   | Modified IDSA                        | 37                 | 65                |                                      | 0                                          | 2 to 6                                  |                                       | No                            | Not stated                                  | 89                 | 52             | 72                 | 100            |
| Esteban 2013 <sup>15</sup>            | PJI, DRI              | Modified IDSA                        | 70 <sup>d</sup>    | 33 <sup>d</sup>   |                                      | 46 <sup>f</sup>                            | 3 to 5                                  |                                       | Yes                           | 100 <sup>n</sup>                            | 68                 | 60             | 94                 | 98             |
| Puig-Verdie 2013 <sup>16</sup>        | PJI                   | IDSA <sup>7</sup>                    | 109                | 208               | 85                                   | 6                                          | ≥5                                      |                                       | No                            | 50                                          | 90                 | 67             | 99                 | 100            |
| Cazanave 2013 <sup>17</sup>           | PJI                   | Clinical <sup>2</sup>                | 144                | 290               |                                      | 43                                         | ≥2                                      | Synovial only                         | Yes                           | 2                                           | 73                 | 70             | 98                 | 98             |
| Portillo 2014 <sup>18</sup>           | PJI                   | Modified MSIS                        | 69                 | 162               | 65                                   | 48                                         | 5                                       |                                       | No                            | 2 to 50 <sup>im</sup>                       | 81                 | 61             | 99                 | 100            |
| Yano 2014 <sup>19</sup>               | DRI                   | Clinical <sup>2</sup>                | 125                | 55                |                                      | 31                                         | ≥2, mean 2.9                            |                                       | Yes                           | 0.1 to 5 <sup>i</sup>                       | 90                 | 57             | 91                 | 96             |
| Janz 2015 <sup>20</sup>               | PJI                   | Modified IDSA                        | 31                 | 88                |                                      |                                            | 2 to 6                                  |                                       | No                            | Not stated <sup>j</sup>                     | 74                 | 65             | 85                 | 100            |
| Portillo 2015 <sup>21</sup>           | PJI, DRI              | Modified MSIS                        | 69                 | 162               |                                      | 56                                         | Not stated                              | Sonication only                       | No                            | 50                                          | 87                 | 59             | 100                | 100            |
| Puchner 2016 <sup>22</sup>            | DRI                   | MSIS <sup>13</sup>                   | 23                 | 8                 |                                      | 61                                         | Not stated                              |                                       | No                            | 2 <sup>m</sup>                              | 91                 | 52             | 100                | 100            |
| Hischebeth 2016 <sup>23</sup>         | PJI                   | Histopathology                       | 47                 | 33                |                                      |                                            | Not stated                              | Sonication only                       | Yes                           | Not stated                                  | 72                 | 61             | 76                 | 77             |
| Rak 2016 <sup>24</sup>                | PJI                   | MSIS <sup>13</sup>                   | 58                 | 29                | <sup>g</sup>                         | 28                                         | 5 to 10                                 |                                       | No                            | Not stated                                  | 93                 | 76             | 77                 | 69             |
| Grosso 2017 <sup>25</sup>             | PJI                   | Modified clinical                    | 25                 | 28                |                                      | 0                                          | 2 to 8                                  |                                       | No                            | 2 to 20                                     | 56                 | 96             | 93                 | 75             |
| Tani 2017 <sup>26</sup>               | PJI                   | IDSA <sup>7</sup>                    | 61                 | 53                | <sup>g</sup>                         | 0                                          | ≥5                                      |                                       | No                            | 50                                          | 77                 | 56             | 98                 | 94             |
| Van Diek 2017 <sup>27</sup>           | PJI                   | MSIS <sup>13</sup>                   | 75                 | 177               | 81                                   | 0                                          | ≥6                                      |                                       | No                            | 50                                          | 47                 | 68             | 99                 | 80             |
| Renz 2017 <sup>28</sup>               | PJI                   | EBJIS <sup>32</sup>                  | 78                 | 33                |                                      | 0                                          | Not stated                              |                                       | No                            | 10 to 50 <sup>l</sup>                       | 58                 | 51             | 100                | 100            |
| Fernandez-Sampedro 2017 <sup>29</sup> | PJI                   | Modified IDSA                        | 130                | 368               | 86                                   | 19                                         | 3 to 6                                  |                                       | Not stated                    | 10 <sup>m</sup>                             | 85                 | 62             | 100                | 100            |
| Rothenberg 2017 <sup>30</sup>         | PJI                   | MSIS <sup>13</sup>                   | 178                | 325               |                                      |                                            | ≥2                                      |                                       | Yes                           | 10 to 250                                   | 93                 | 70             | 93                 | 98             |

17

18 Table footnotes:

19 a Duration of symptoms < 3 months

20 b Synovial fluid included as a tissue specimen by most studies; median number of specimens not reported

21 c Colony-forming units per millilitre of unconcentrated sonication fluid

22 d More than one prosthetic component per patient submitted; number of components reported

23 e Proportion receiving antibiotics in preceding 4 weeks

24 f Proportion receiving antibiotics in preceding 7 days

25 g Mean duration of infection >12 months

26 h Proportion of infections of more than 12 months' duration

27 i Variable diagnostic threshold according to clinical or microbiologic criteria

28 j For non-clinical definitions of infection, positive culture led to inclusion of patients with no additional diagnostic criteria for infection

29 k PJI: Prosthetic Joint Infection; DRI: Device-related orthopaedic infection (other than prosthetic joints)

30 m Theoretical limit of detection

31 n Colony-forming units per millilitre of concentrated sonication fluid; concentration ratio not described

32 p Automated liquid mycobacterial culture not included in definition

33

| Reference standard definition of infection | Criteria for diagnosis of infection within each reference standard definition                                                                                                                                                                    |                                                                                                                                                                                                                        |
|--------------------------------------------|--------------------------------------------------------------------------------------------------------------------------------------------------------------------------------------------------------------------------------------------------|------------------------------------------------------------------------------------------------------------------------------------------------------------------------------------------------------------------------|
|                                            | Clinical Criteria                                                                                                                                                                                                                                | Microbiological Criteria                                                                                                                                                                                               |
| Clinical                                   | Presence of a sinus OR<br>Visible purulence OR<br>Histology positive for infection                                                                                                                                                               | None                                                                                                                                                                                                                   |
| Consensus                                  | Presence of a sinus OR<br><i>Three of the following minor criteria:</i><br><i>Elevated serum CRP AND ESR</i><br><i>Visible purulence<sup>1</sup></i><br><i>Histology positive for infection</i><br><i>Single positive periprosthetic culture</i> | OR Two positive (periprosthetic) tissue cultures with phenotypically indistinguishable organisms                                                                                                                       |
| IDSA                                       | Presence of a sinus OR<br>Visible purulence OR<br>Histology positive for infection                                                                                                                                                               | OR Two positive (periprosthetic) tissue cultures with phenotypically indistinguishable organisms<br>OR growth of virulent organism (e.g. <i>S. aureus</i> ) in a single tissue specimen or synovial fluid <sup>2</sup> |
| Composite                                  | Presence of a sinus OR<br>Visible purulence OR<br>Histology positive for infection                                                                                                                                                               | OR Two positive periprosthetic cultures with phenotypically indistinguishable organisms<br>OR Sonication culture positive                                                                                              |

36  
37 Table footnotes:

38 1 Visible purulence at surgery was substituted for elevated synovial leucocyte count, ++ change on leucocyte esterase strip test, and elevated synovial fluid polymorphonuclear cell percentage; as these tests were  
39 not routinely carried out in our centre.

40 2 For the purposes of our analyses using the IDSA criteria the only organism we included as evidence of infection if isolated from a single deep tissue biopsy was *S. aureus*.

41  
42

43

44 **Table S - 3. Anatomical location of explanted joint prostheses & components.**

| <b>Joint</b> | <b>No. (%)</b> |
|--------------|----------------|
| Shoulder     | 2 (0.6)        |
| Elbow        | 7 (2.0)        |
| Hip          | 159 (45.8)     |
| Knee         | 176 (50.7)     |
| Ankle        | 3 (0.9)        |
| Total        | 347            |

45

46 **Table S - 4. Anatomical location of other orthopaedic devices.**

47

| <b>Source</b> | <b>No. (%)</b> |
|---------------|----------------|
| Clavicle      | 1 (0.6)        |
| Humerus       | 13 (8.2)       |
| Elbow         | 5 (3.2)        |
| Forearm       | 5 (3.2)        |
| Femur         | 47 (29.8)      |
| Tibia         | 61 (38.6)      |
| Ankle/foot    | 24 (15.2)      |
| Spine         | 2 (1.2)        |
|               | 15             |
| Total         | 8              |

48

49  
50  
51  
52

Supplementary Table S-5. Regression coefficients ( $\beta$ ), and adjusted odds ratio and 95% CI for variables included in multivariable logistic regression model of potential associations with tissue and sonication culture yield.

| Variable                            | Tissue culture |                     |         | Sonication culture |                     |         |
|-------------------------------------|----------------|---------------------|---------|--------------------|---------------------|---------|
|                                     | $\beta$        | Odds ratio (95% CI) | p value | $\beta$            | Odds ratio (95% CI) | p value |
| Antibiotic free days before surgery | 0.012228       | 1.01 (0.95-1.08)    | 0.709   | 0.044472           | 1.05 (0.99-1.11)    | 0.119   |
| Organism virulence                  | 2.137526       | 8.48 (1.68-42.8)    | 0.010   | - 0.335979         | 0.71 (0.21-2.40)    | 0.586   |
| Months since device implantation    | 0.000060       | 1.00 (0.99-1.01)    | 0.993   | - 0.006871         | 0.99 (0.99-1.00)    | 0.056   |
| Presence of sinus                   | 0.756216       | 2.13 (0.45-10.0)    | 0.338   | 0.160056           | 1.17 (0.40-3.44)    | 0.770   |
| Visible purulence                   | 0.892211       | 2.44 (0.56-10.6)    | 0.235   | 0.550222           | 1.73 (0.59-5.11)    | 0.318   |

Table S - 6 Clinical and microbiological characteristics of cases from which mixed infections were identified by tissue and/or sonication culture.

| Case no.                                                                        | Specimen type           | Time since implantation (months) | Antibiotics in preceding 14 days | Clinically infected | Prosthetic joint infection | Sonication culture                                              | Tissue culture                                                                             |
|---------------------------------------------------------------------------------|-------------------------|----------------------------------|----------------------------------|---------------------|----------------------------|-----------------------------------------------------------------|--------------------------------------------------------------------------------------------|
| <i>Identical isolates from tissue and sonication culture</i>                    |                         |                                  |                                  |                     |                            |                                                                 |                                                                                            |
| 18                                                                              | bone                    |                                  | yes                              | yes                 | no                         | Staphylococcus aureus, Streptococci                             | Staphylococcus aureus, Streptococci (Group G)                                              |
| 49                                                                              | prosthesis (± hardware) | 2                                |                                  | yes                 | yes                        | Coagulase negative Staphylococci, Enterococcus spp              | Enterococcus spp, Staphylococcus epidermidis                                               |
| 51                                                                              | hardware only           | 59                               | no                               | yes                 | no                         | Citrobacter koseri, Enterococcus faecalis, Streptococci         | Citrobacter koseri, Enterococcus faecalis, Streptococci (Group B)                          |
| 185                                                                             | prosthesis (± hardware) | 34                               | no                               | yes                 | yes                        | Enterococcus faecalis, Klebsiella oxytoca                       | Enterococcus faecalis, Klebsiella oxytoca                                                  |
| 224                                                                             | bone                    | 9                                | yes                              | yes                 | no                         | Corynebacterium spp, Staphylococcus aureus                      | Corynebacterium striatum, Staphylococcus aureus                                            |
| 248                                                                             | hardware only           | 7                                | yes                              | yes                 | no                         | Enterococcus faecalis, Escherischia coli                        | Escherischia coli, Enterococcus faecalis                                                   |
| 257                                                                             | components (± hardware) | 9                                | no                               | yes                 | yes                        | Enterococcus faecalis, Staphylococcus aureus                    | Enterococcus faecalis, Staphylococcus aureus                                               |
| 278                                                                             | components (± hardware) | 4                                | no                               | yes                 | yes                        | Enterococcus faecalis, Escherischia coli, Klebsiella pneumoniae | Enterococcus faecalis, Escherischia coli, Klebsiella pneumoniae                            |
| 325                                                                             | prosthesis (± hardware) | 53                               | yes                              | yes                 | yes                        | Enterococcus faecalis, Pseudomonas aeruginosa                   | Enterococcus faecalis, Pseudomonas aeruginosa                                              |
| 326                                                                             | hardware only           | 4                                |                                  | yes                 | no                         | Enterobacter cloacae, Pseudomonas otitidis                      | Enterobacter cloacae, Pseudomonas otitidis                                                 |
| 424                                                                             | components (± hardware) | 0                                | no                               | yes                 | yes                        | Coagulase negative Staphylococci                                | Staphylococcus epidermidis, Staphylococcus lugdunensis                                     |
| 440                                                                             | hardware only           | 56                               | yes                              | no                  | no                         | Aeromonas hydrophila, Staphylococcus aureus                     | Aeromonas spp, Pseudomonas aeruginosa, Staphylococcus aureus                               |
| 523                                                                             | components (± hardware) | 423                              | no                               | yes                 | yes                        | Escherischia coli, Proteus mirabilis                            | Escherischia coli, Proteus mirabilis                                                       |
| 553                                                                             | prosthesis (± hardware) | 107                              | yes                              | yes                 | yes                        | Coagulase negative Staphylococci, Pseudomonas aeruginosa        | Coagulase negative Staphylococci, Pseudomonas aeruginosa                                   |
| <i>At least one but not all tissue and sonication culture isolates the same</i> |                         |                                  |                                  |                     |                            |                                                                 |                                                                                            |
| 54                                                                              | prosthesis (± hardware) | 35                               | yes                              | yes                 | yes                        | Staphylococcus aureus                                           | Enterobacter cloacae, Staphylococcus aureus                                                |
| 127                                                                             | hardware only           | 25                               |                                  | yes                 | no                         | Propionibacterium avidum                                        | Actinomyces neuui, Propionibacterium avidum                                                |
| 144                                                                             | components (± hardware) | 2                                | no                               | yes                 | yes                        | Enterococcus faecalis, Pseudomonas aeruginosa                   | Enterococcus faecalis, Morganella morganii, Pseudomonas aeruginosa, Streptococci (Group B) |
| 153                                                                             | prosthesis (± hardware) | 120                              | no                               | yes                 | yes                        | Streptococci                                                    | Streptococcus dysgalactiae, Streptococcus equisimilis                                      |
| 166                                                                             | hardware only           | 68                               | no                               | yes                 | no                         | Staphylococcus aureus                                           | Escherischia coli, Staphylococcus aureus                                                   |
| 177                                                                             | prosthesis (± hardware) | 2                                | yes                              | yes                 | yes                        | Anaerobes, Enterobacter cloacae                                 | Enterobacter cloacae, Enterococcus faecium                                                 |
| 196                                                                             | hardware only           | 9                                | yes                              | yes                 | no                         | Staphylococcus aureus                                           | Klebsiella pneumoniae, Staphylococcus aureus                                               |
| 247                                                                             | prosthesis (± hardware) | 55                               |                                  | yes                 | yes                        | Pasteurella multocida                                           | Enterococcus faecalis, Pasteurella multocida                                               |
| 260                                                                             | hardware only           | 85                               | no                               | yes                 | no                         | Coagulase negative Staphylococci                                | Corynebacterium propinquum, Staphylococcus lugdenensis                                     |

|                                                                           |                         |     |     |     |     |                                                           |                                                                          |
|---------------------------------------------------------------------------|-------------------------|-----|-----|-----|-----|-----------------------------------------------------------|--------------------------------------------------------------------------|
| 283                                                                       | cement                  | 28  | no  | yes | no  | Pseudomonas aeruginosa                                    | Pseudomonas aeruginosa, Staphylococcus aureus, Streptococci (Group B)    |
| 303                                                                       | hardware only           | 16  | no  | yes | no  | Escherischia coli                                         | Enterococcus faecalis, Escherischia coli                                 |
| 313                                                                       | components (± hardware) | 79  | yes | yes | yes | Staphylococcus aureus                                     | Pseudomonas aeruginosa, Staphylococcus aureus                            |
| 387                                                                       | hardware only           |     |     | no  | no  | Enterobacter cloacae                                      | Enterobacter cloacae, Klebsiella pneumoniae                              |
| 406                                                                       | hardware only           | 7   | no  | yes | no  | Enterobacter cloacae, Pseudomonas aeruginosa              | Enterobacter cloacae, Pseudomonas aeruginosa, Staphylococcus epidermidis |
| 419                                                                       | components (± hardware) | 0   | no  | no  | yes | Coagulase negative Staphylococci                          | Enterococcus avium, Staphylococcus epidermidis                           |
| 426                                                                       | components (± hardware) | 0   | yes | yes | yes | Staphylococcus aureus                                     | Staphylococcus aureus, Streptococcus dysgalactiae,                       |
| 430                                                                       | hardware only           | 331 | yes | yes | no  | Enterobacter cloacae, Staphylococcus aureus               | Staphylococcus aureus, Streptococcus dysgalactiae                        |
| 449                                                                       | prosthesis (± hardware) | 45  | no  | yes | yes | Staphylococcus aureus                                     | Corynebacterium striatum, Escherischia coli, Staphylococcus aureus       |
| 465                                                                       | hardware only           | 52  | no  | yes | no  | Streptococci                                              | Enterobacter cloacae, Staphylococcus aureus, Streptococci (Group B)      |
| 530                                                                       | components (± hardware) | 53  | yes | yes | yes | Enterobacter cloacae                                      | Enterobacter cloacae, Escherischia coli                                  |
| 547                                                                       | components (± hardware) | 1   | no  | yes | yes | Enterococcus faecalis                                     | Enterococcus faecalis, Staphylococcus epidermidis                        |
| <i>Mixed isolates from sonication culture but tissue culture negative</i> |                         |     |     |     |     |                                                           |                                                                          |
| 9                                                                         | components (± hardware) | 44  | no  | no  | yes | Coagulase negative Staphylococci, Propionibacterium acnes |                                                                          |
| 50                                                                        | prosthesis (± hardware) | 59  | yes | yes | yes | Enterococcus faecalis, Streptococci                       |                                                                          |
| 109                                                                       | hardware only           | 5   | yes | yes | no  | Coagulase negative Staphylococci, Escherischia coli       |                                                                          |
| 187                                                                       | components (± hardware) | 2   | yes | yes | yes | Escherischia coli, Proteus mirabilis                      |                                                                          |
| 232                                                                       | prosthesis (± hardware) | 64  | yes | yes | yes | Staphylococcus aureus, Staphylococcus condimenti          |                                                                          |
| 391                                                                       | prosthesis (± hardware) | 21  |     | yes | yes | Arcanobacterium haemolyticum, Enterococcus faecalis       |                                                                          |
| 410                                                                       | prosthesis (± hardware) | 16  | yes | yes | yes | Coagulase negative Staphylococci, Enterococcus faecalis   |                                                                          |
| 418                                                                       | components (± hardware) | 13  | yes | yes | yes | Coagulase negative Staphylococci, Enterobacter cloacae    |                                                                          |
| 429                                                                       | hardware only           | 3   | no  | no  | no  | Bacillus spp, Coagulase negative Staphylococci            |                                                                          |
| <i>Mixed isolates from tissue culture but sonication culture negative</i> |                         |     |     |     |     |                                                           |                                                                          |
| 163                                                                       | prosthesis (± hardware) | 22  | no  | yes | yes |                                                           | Enterococcus faecalis, Staphylococcus epidermidis                        |
| 394                                                                       | components (± hardware) | 37  | no  | yes | yes |                                                           | Campylobacter ureolyticus, Fingoldia magna, Peptoniphilus harei          |
| 471                                                                       | hardware only           | 10  | no  | yes | no  |                                                           | Staphylococcus aureus, Pseudomonas aeruginosa                            |
| 517                                                                       | hardware only           |     | no  | yes | no  |                                                           | Staphylococcus aureus, Pseudomonas aeruginosa                            |
| <i>Isolates from tissue and sonication culture completely discordant</i>  |                         |     |     |     |     |                                                           |                                                                          |
| 142                                                                       | hardware only           | 6   | no  | yes | no  | Coagulase negative Staphylococci                          | Klebsiella oxytoca, Pseudomonas aeruginosa                               |
| 212                                                                       | cement                  | 2   |     | yes | no  | Propionibacterium acnes                                   | Bacteroides fragilis, Escherischia coli                                  |
| 309                                                                       | hardware only           | 234 | no  | yes | no  | Streptococci                                              | Bacillus fragilis, Escherischia coli, Pseudomonas aeruginosa             |



**Clinical Features:**

- Peri-prosthetic loosening
- No soft tissue inflammation
- Usually indolent presentation
- Marked soft tissue inflammation
- Purulence ± sinus formation
- Presentation may be more acute

**ANATOMICAL & BIOLOGICAL SPECTRUM**

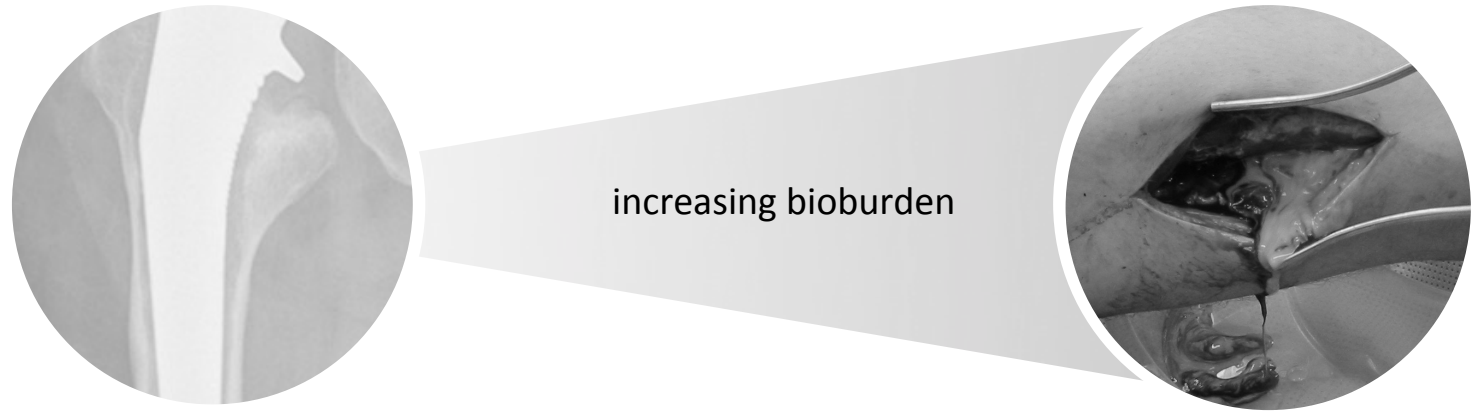

**Microbiology:**

- Usually less virulent organisms
- Mainly biofilm
- Often more virulent organisms
- Biofilm and planktonic bacteria

## 58 **Supplementary references**

- 59 1. Trampuz A, Piper KE, Hanssen AD, Osmon DR, Cockerill FR, Steckelberg JM, Pater R. 2006. Sonication  
60 of explanted prosthetic components in bags for diagnosis of prosthetic joint infection is associated  
61 with risk of contamination. *J Clin Microbiol* 44(2): 628-31.
- 62 2. Trampuz A, Piper KE, Jacobson MJ, Hanssen AD, Unni KK, Osmon DR, Mandrekar JN, Cockerill FR,  
63 Steckelberg JM, Greenleaf JF, Patel R. 2007. Sonication of removed hip and knee prostheses for  
64 diagnosis of infection. *N Engl J Med* 357(7): 654-63.
- 65 3. Dora C, Altwegg M, Gerber C, Bottger EC, Zbinden R. 2008. Evaluation of conventional  
66 microbiological procedures and molecular genetic techniques for diagnosis of infections in patients  
67 with implanted orthopedic devices. *J Clin Microbiol* 46(2): 824-5.
- 68 4. Esteban J, Gomez-Barrena E, Cordero J, Martin-de- Hijas NZ, Kinnari TJ, Fernandez-Roblas R. 2008.  
69 Evaluation of quantitative analysis of cultures from sonicated retrieved orthopedic implants in  
70 diagnosis of orthopedic infection. *J Clin Microbiol* 46(2): 488-92.
- 71 5. Piper KE, Jacobson MJ, Cofield RH, Sperling JW, Sanchez-Sotelo J, Osmon DR, McDowell A, Patrick S,  
72 Steckelberg JM, Mandrekar JN, Fernandez Sampedro M, Patel R. 2009. Microbiologic diagnosis of  
73 prosthetic shoulder infection by use of implant sonication. *J Clin Microbiol* 47(6): 1878-84.
- 74 6. Sampedro MF, Huddleston PM, Piper KE, Karau MJ, Dekutoski MB, Yaszemski MJ, Currier BL,  
75 Mandrekar JN, Osmon DR, McDowell A, Patrick S, Steckelberg JM, Patel R. 2010. A biofilm approach to  
76 detect bacteria on removed spinal implants. *Spine (Phila Pa 1976)* 35(12): 1218-24.
- 77 7. Osmon DR, Berbari EF, Berendt AR, Lew D, Zimmerli W, Steckelberg JM, Rao N, Hanssen A, Wilson  
78 WR; Infectious Diseases Society of America. 2013. Diagnosis and management of prosthetic joint  
79 infection: clinical practice guidelines by the Infectious Diseases Society of America. *Clin Infect Dis*  
80 56(1): e1-e25.
- 81 8. Vergidis P, Greenwood-Quaintance KE, Sanchez-Sotelo J, Morrey BF, Steinmann SP, Karau MJ, Osmon  
82 DR, Mandrekar JN, Steckelberg JM, Patel R. 2011. Implant sonication for the diagnosis of prosthetic  
83 elbow infection. *J Shoulder Elbow Surg* 20(8): 1275-81.

- 84 9. Bjerkan G, Witso E, Nor A, Viset T, Loseth K, Lydersen S, Persen L, Bergh K. 2012. A comprehensive  
85 microbiological evaluation of fifty-four patients undergoing revision surgery due to prosthetic joint  
86 loosening. *J Med Microbiol* 61(Pt 4): 572-81.
- 87 10. Gomez E, Cazanave C, Cunningham SA, Greenwood-Quaintance KE, Steckelberg JM, Uhl JR, Hanssen  
88 AD, Karau MJ, Schmidt SM, Osmon DR, Berbari EF, Mandrekar J, Patel R. 2012. Prosthetic joint infection  
89 diagnosis using broad-range PCR of biofilms dislodged from knee and hip arthroplasty surfaces using  
90 sonication. *J Clin Microbiol* 50(11): 3501-8.
- 91 11. Borens O, Yusuf E, Steinrucken J, Trampuz A. 2013. Accurate and early diagnosis of orthopedic  
92 device-related infection by microbial heat production and sonication. *J Orthop Res* 31(11): 1700-3.
- 93 12. Evangelopoulos DS, Stathopoulos IP, Morassi GP, Koufos S, Albami A, Karampinas PK, Stylianakis A,  
94 Kohl S, Pneumaticos S, Vlamis J. 2013. Sonication: a valuable technique for diagnosis and treatment of  
95 periprosthetic joint infections. *ScientificWorldJournal* 2013: 375140.
- 96 13. Parvizi J, Zmistowski B, Berbari EF, Bauer TW, Springer BD, Della Valle CJ, Garvin KL, Mont MA,  
97 Wongworawat MD, Zalavras CG. 2011. New definition for periprosthetic joint infection: from the  
98 Workgroup of the Musculoskeletal Infection Society. *Clin Orthop Relat Res* 469(11): 2992-4.
- 99 14. Janz V, Wassilew GI, Hasart O, Tohtz S, Perka C. 2013. Improvement in the detection rate of PJI in  
100 total hip arthroplasty through multiple sonicate fluid cultures. *J Orthop Res* 31(12): 2021-4.
- 101 15. Esteban J, Alvarez-Alvarez B, Blanco A, Fernandez-Roblas R, Gadea I, Garcia-Canete J, Sandoval E,  
102 Valdazo M. 2013. Prolonged incubation time does not increase sensitivity for the diagnosis of implant-  
103 related infection using samples prepared by sonication of the implants. *Bone Joint J* 95-B(7): 1001-6.
- 104 16. Puig-Verdie L, Alentorn-Geli E, Gonzalez-Cuevas A, Sorli L, Salvado M, Alier A, Pelfort X, Portillo ME,  
105 Horcajada JP. 2013. Implant sonication increases the diagnostic accuracy of infection in patients with  
106 delayed, but not early, orthopaedic implant failure. *Bone Joint J* 95-B(2): 244-9.
- 107 17. Cazanave C, Greenwood-Quaintance KE, Hanssen AD, Karau MJ, Schmidt SM, Gomez Urena EO,  
108 Mandrekar JN, Osmon DR, Lough LE, Pritt BS, Steckelberg JM, Patel R. 2013. Rapid molecular  
109 microbiologic diagnosis of prosthetic joint infection. *J Clin Microbiol* 51(7): 2280-7.

- 110 18. Portillo ME, Salvado M, Alier A, Martinez S, Sorli L, Horcajada JP, Puig L. 2014. Advantages of  
111 sonication fluid culture for the diagnosis of prosthetic joint infection. *J Infect* 69(1): 35-41.
- 112 19. Yano MH, Klautau GB, da Silva CB, Nigro S, Avanzi O, Mercadante MT, Salles MJ. 2014. Improved  
113 diagnosis of infection associated with osteosynthesis by use of sonication of fracture fixation implants.  
114 *J Clin Microbiol* 52(12): 4176-82.
- 115 20. Janz V, Wassilew GI, Kribus M, Trampuz A, Perka C. 2014. Improved identification of polymicrobial  
116 infection in total knee arthroplasty through sonicate fluid cultures. *Arch Orthop Trauma Surg* 135(10):  
117 1453-7.
- 118 21. Portillo ME, Salvado M, Trampuz A, Siverio A, Alier A, Sorli L, Martinez S, Perez-Prieto D, Horcajada  
119 JP, Puig-Verdie L. 2015. Improved diagnosis of orthopedic implant-associated infection by inoculation  
120 of sonication fluid into blood culture bottles. *J Clin* 53(5): 1622-7.
- 121 22. Puchner SE, Doring K, Staats K, Boehler C, Lass R, Hirschl AM, Presterl E, Windhager R, Holinka J.  
122 2017. Sonication culture improves microbiological diagnosis of modular megaprotheses. *J Orthop Res*  
123 35(7): 1383-7.
- 124 23. Hischebeth GT, Randau TM, Molitor E, Wimmer MD, Hoerauf A, Bekeredjian-Ding I, Gravius S. 2016.  
125 Comparison of bacterial growth in sonication fluid cultures with periprosthetic membranes and with  
126 cultures of biopsies for diagnosing periprosthetic joint infection. *Diagn Microbiol Infect Dis* 84(2): 112-  
127 5.
- 128 24. Rak M, Kavcic M, Trebse R, Co RA. 2016. Detection of bacteria with molecular methods in  
129 prosthetic joint infection: sonication fluid better than periprosthetic tissue. *Acta Orthop* 87(4): 339-  
130 45.
- 131 25. Grosso MJ, Frangiamore SJ, Yakubek G, Bauer TW, Iannotti JP, Ricchetti ET. Performance of implant  
132 sonication culture for the diagnosis of periprosthetic shoulder infection. 2017. *J Shoulder Elbow Surg*
- 133 26. Tani S, Lepetsos P, Stylianakis A, Vlamis J, Birbas K, Kaklamanos I. 2017. Superiority of the  
134 sonication method against conventional periprosthetic tissue cultures for diagnosis of prosthetic joint  
135 infections. *Eur J Orthop Surg Traumatol*

- 136 27. Van Diek FM, Albers CGM, Van Hooff ML, Meis JF, Goosen JHM. 2017. Low sensitivity of implant  
137 sonication when screening for infection in revision surgery. *Acta Orthop* 88(3): 294-9.
- 138 28. Renz N, Feihl S, Cabric S, Trampuz A. 2017. Performance of automated multiplex PCR using  
139 sonication fluid for diagnosis of periprosthetic joint infection: a prospective cohort. *Infection* 45(6):  
140 877-84.
- 141 29. Fernandez-Sampedro M, Farinas-Alvarez C, Garces-Zarzalejo C, Alonso-Aquirre MA, Salas-Venero C,  
142 Martinez-Martinez L, Farinas MC. 2017. Accuracy of different diagnostic tests for early, delayed and  
143 late prosthetic joint infection. *BMC Infect Dis* 17(1): 592.
- 144 30. Rothenberg AC, Wilson AE, Hayes JP, Malley MJ, Klatt BA. 2017. Sonication of Arthroplasty Implants  
145 Improves Accuracy of Periprosthetic Joint Infection Cultures. *Clin Orthop Relat Res* 475(7): 1827-36.
- 146 31. Ochsner P, Borens O, Bodler PM, Schweizerische Gesellschaft fuer Orthopaedie und Traumatologie.  
147 2016. Infections of the musculoskeletal system—Basic principles, prevention, diagnosis and treatment.  
148 In: Swiss orthopaedics and the Swiss Society for Infectious Diseases expert group “Infections of the  
149 musculoskeletal system”, Grandvaux, Switzerland.

150

151

152
